# Supplementary material
Source: PubMed Central journal article supplement (PMC5624218)
Supplement: NIHMS906652-supplement-Supplemental_Figures.pdf [file NIHMS906652-supplement-Supplemental_Figures.pdf]

*Supporting Information*

**Selective Targeting by a Mechanism-based Inactivator Against PLP-Dependent Enzymes:  
Mechanisms of Inactivation and Alternative Turnover**

*Romila Mascarenhas<sup>1</sup>, Hoang V. Le<sup>2,3</sup>, Kenneth D. Clevenger<sup>2</sup>, Helaina J. Lehrer<sup>4</sup>, Dagmar Ringe<sup>4</sup>, Neil L. Kelleher<sup>2</sup>, Richard B. Silverman<sup>2\*</sup>, Dali Liu<sup>1\*</sup>*

<sup>1</sup> Department of Chemistry and Biochemistry, Loyola University Chicago, Chicago, Illinois 60660, United States

<sup>2</sup> Department of Chemistry, Department of Molecular Biosciences, Chemistry of Life Processes Institute, Center for Molecular Innovation and Drug Discovery, Northwestern University, Evanston, Illinois 60208, United States

<sup>3</sup> Department of BioMolecular Sciences and Research Institute of Pharmaceutical Sciences, School of Pharmacy, University of Mississippi, University, MS 38677, United States

<sup>4</sup> Departments of Chemistry and Biochemistry and Rosenstiel Basic Medical Sciences Research Center, Brandeis University, Waltham, MA 02454-9110, United States

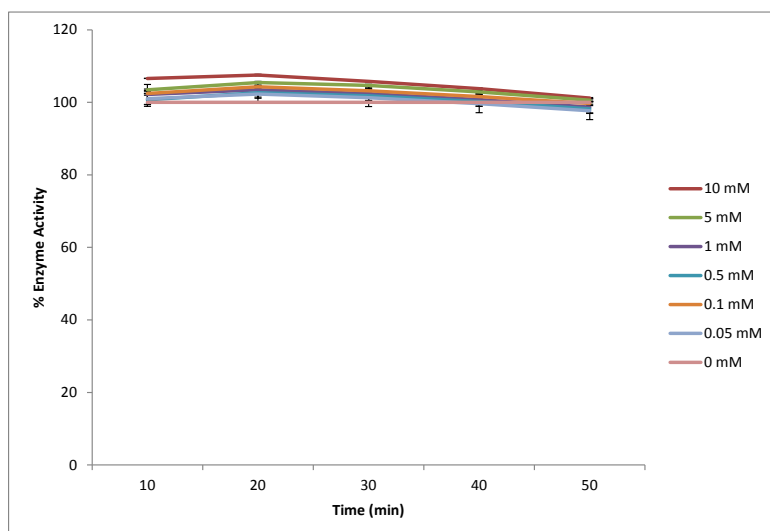

Figure S1. Enzyme activity of Asp-AT at various concentrations of FCP

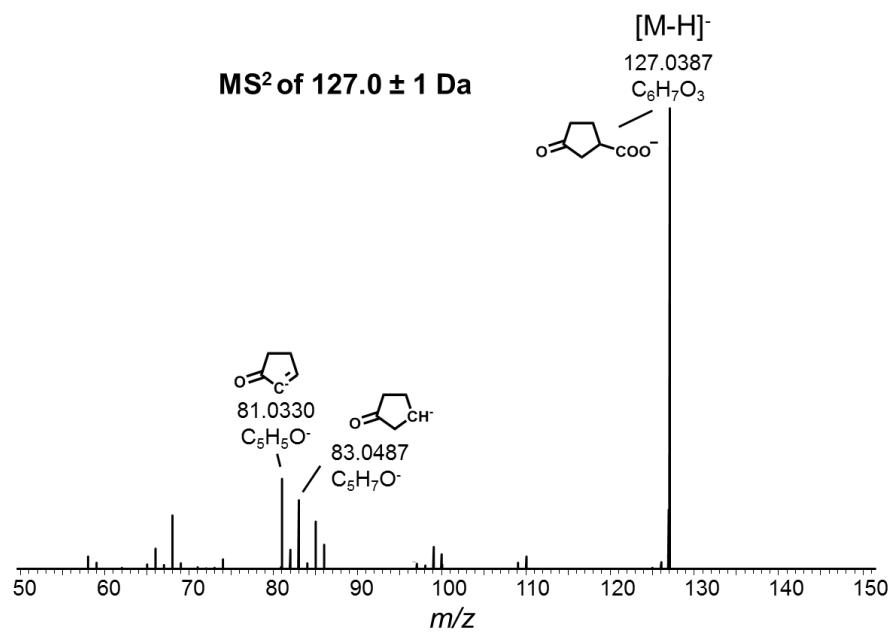

Figure S2. MS<sup>2</sup> fragment assignment for 3-oxocyclopentane-1-carboxylate (**12**) produced by the incubation of FCP with Asp-AT.

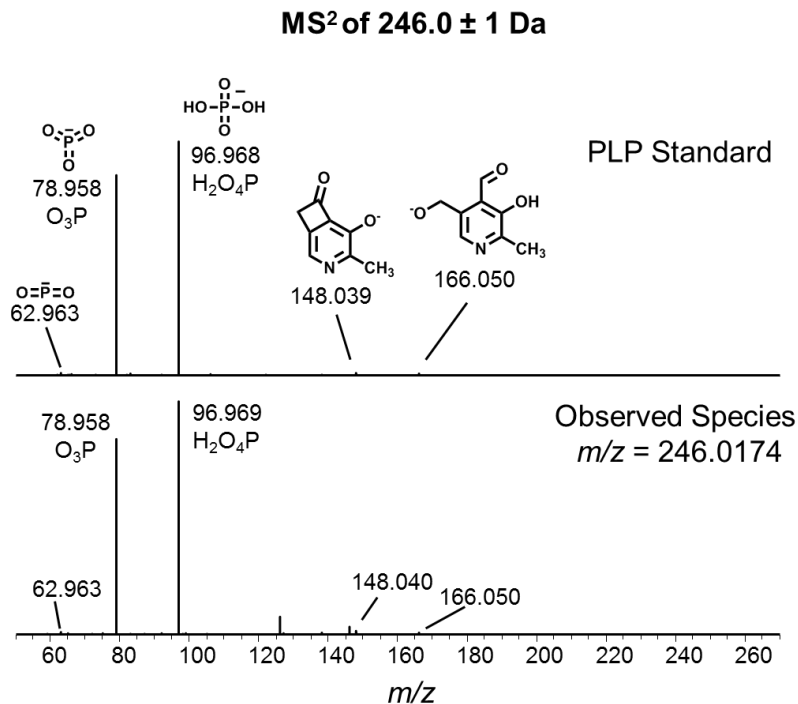

Figure S3. Comparison of MS<sup>2</sup> fragmentation of synthetic PLP standard and the observed PLP product of FCP turnover by Asp-AT.

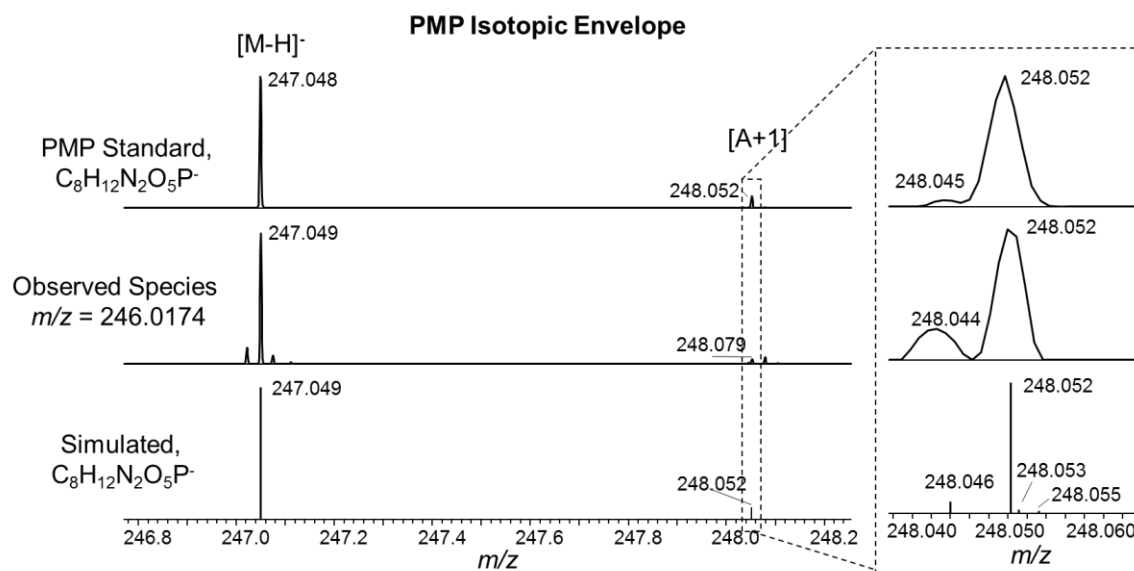

Figure S4. MS1 isotopic envelope of PMP synthetic standard compared to the observed species from the incubation of FCP with Asp-AT, and the computer-simulated isotopic envelope of  $C_8H_{12}N_2O_5P^-$ .

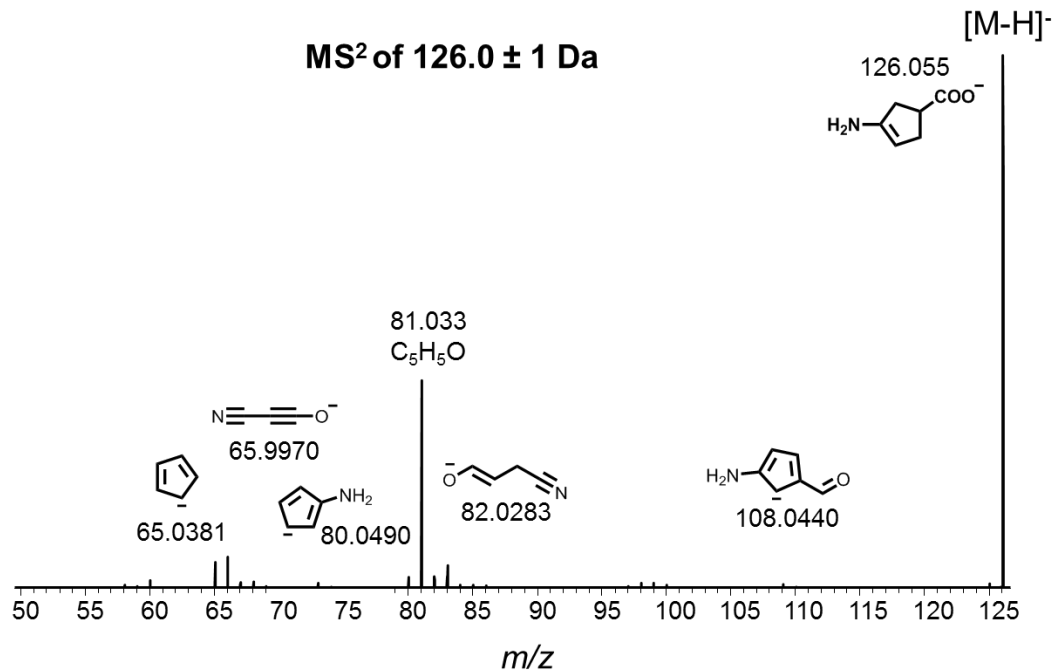

Figure S5. MS<sup>2</sup> fragment assignment for **7**, produced by the incubation of FCP with Asp-AT.

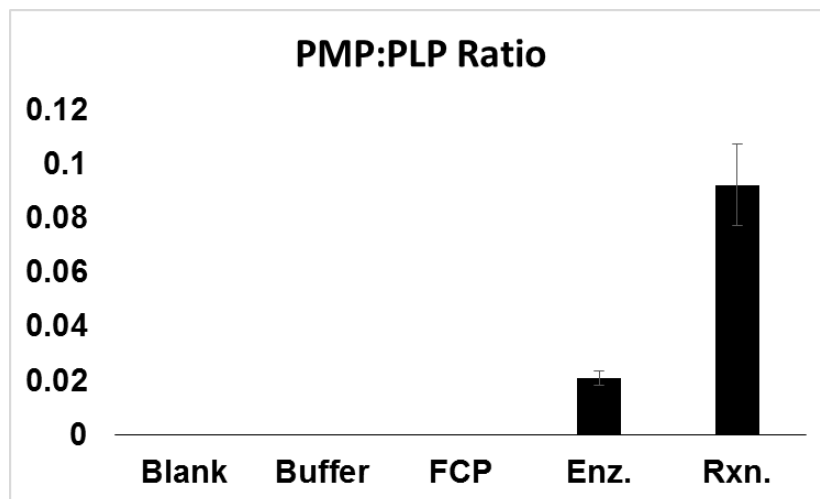

Figure S6. Effect of FCP incubation on PMP:PLP ratio. The ratio of PMP:PLP from naïve OAT (untreated with FCP) was found to be  $.021 \pm .002$ , while the ratio of PMP:PLP from OAT treated with FCP increased > 4-fold to  $0.09 \pm .02$ , indicating the FCP turnover mechanism results in conversion of PLP to PMP.

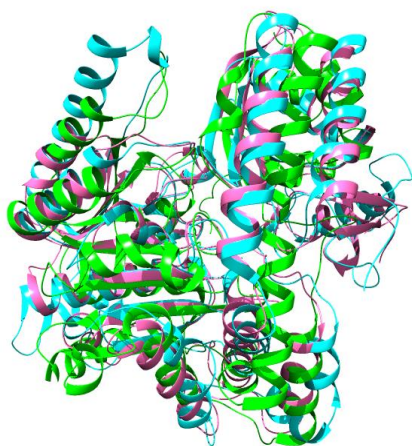

Figure S7. Overlap of the secondary structures of OAT from PDB 1OAT (pink), GABA-AT from PDB 1OHV (cyan), and Asp-AT from PDB 2AAT (green)

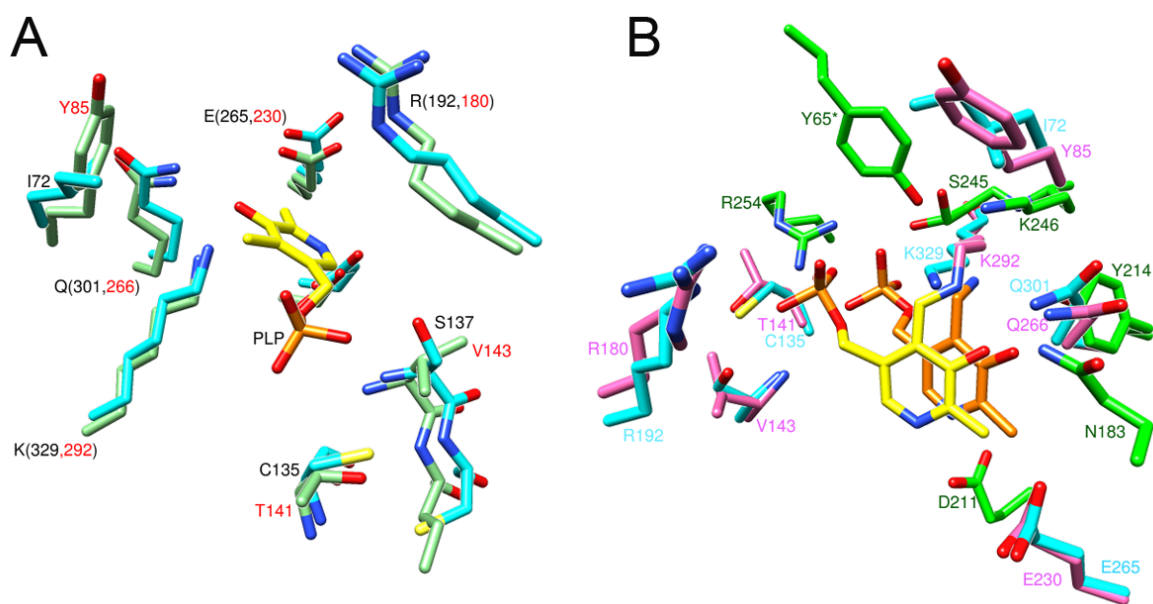

Figure S8. A) Overlap of the active sites of OAT (green) and GABA-AT (cyan)

B) Overlap of the active sites of OAT (pink), GABA-AT (cyan), and Asp-AT (green)

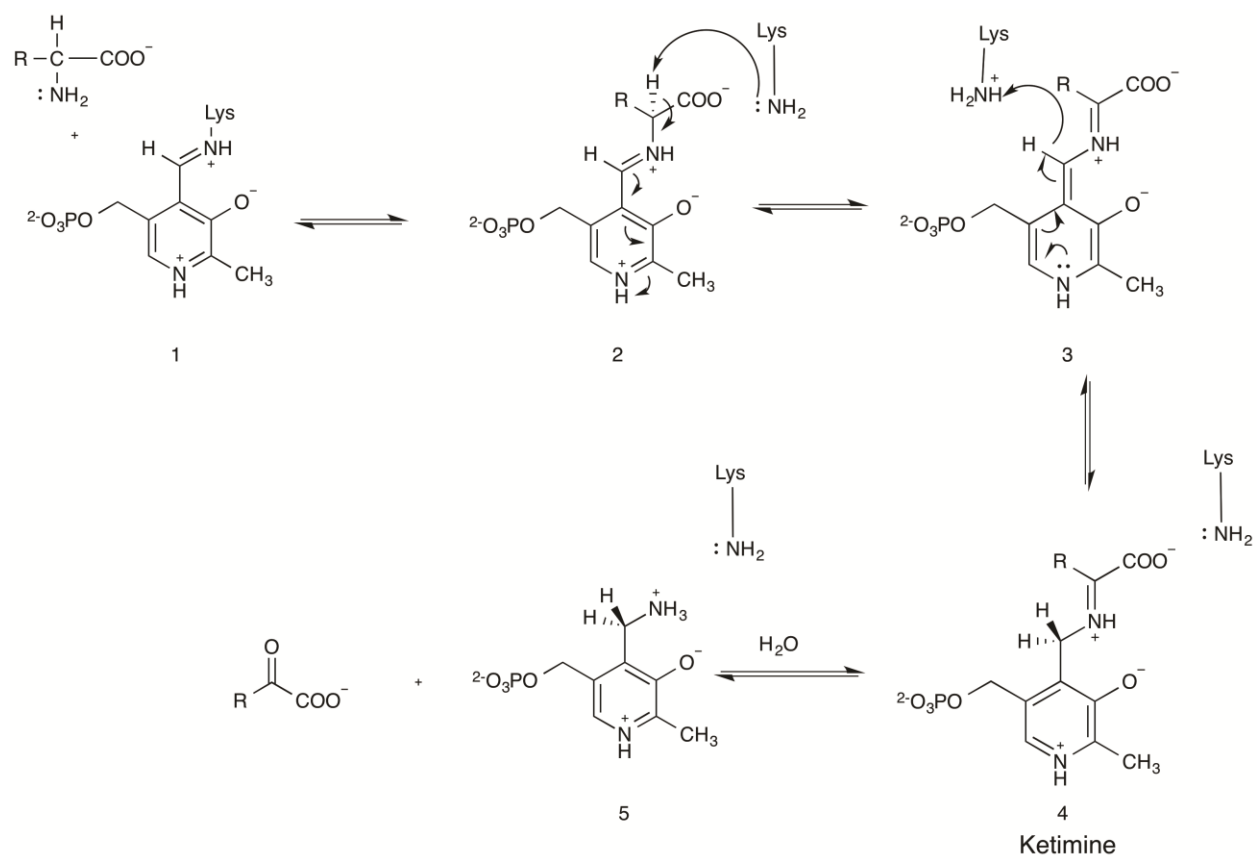

Scheme S1. General mechanism of Asp-AT.
